# Supplementary material for: Electrogenerated chemiluminescence of bis[4-(dimethylamino)phenyl]squaraine
Source: Royal Society of Chemistry journal article supplement (doi:10.1039/c0cc05818a), 2011-01-01
Supplement: c0cc05818a.pdf [file c0cc05818a.pdf]

Supplementary Material (ESI) for Chemical Communications  
This journal is (c) The Royal Society of Chemistry 2010

## Electrogenerated chemiluminescence of Bis [4-(dimethylamino) phenyl] squaraine

*Le Zhang Yi-Min Fang Ru-Yong Wang Le-Xing You Nan-Yan Fu Guo-Nan Chen  
Jian-jun Sun \**

Key Laboratory of Analysis and Detection for Food Safety, Ministry of Education, Fujian Provincial Key Laboratory of Analysis and Detection Technology for Food Safety, College of Chemistry and Chemical Engineering, Fuzhou University, Fuzhou 350108, China

### Experimental section

**Reagents:** The BDPSQ was prepared in excellent yield by the previously reported method.<sup>S1</sup> Precursor (the squaric acid and N, N-Dimethylaniline) were of analytical reagent grade. TBAP (tetrabutylammonium perchlorate), TBAPF<sub>6</sub> (tetrabutylammonium hexafluorophosphate) were of electrochemistry reagent grade obtained from Alfa Aesar China Co.,Ltd, All other reagents (DMF, CHCl<sub>3</sub>) were of analytical reagent grade and were used before further purification.

**ECL measurement:** ECL and electrochemical measurements were performed at an electrochemical working station V-MP3 (Princeton Applied Research Co. Ltd., USA). ECL signals were recorded by an Ultra-weak Chemiluminescence Analyzer (BPCL-K, Institute of Biophysics, Academia Sinica, Beijing, China) controlled by a personal computer with 0.1 s sample interval. While collecting ECL signals, the cell was placed directly in front of the photomultiplier (PMT operated at 800V) and the PMT window was opened towards the working electrode only. Equipped with a three-electrode ECL cell, the working electrode was Pt electrode (3.0mm in diameter), the reference electrode was an Ag/AgCl (3M KCl) electrode, and the counter electrode was a Pt wire electrode. ECL spectra were measured by a series of filters of 535, 555, 575, 620, 640, 680, 705 and 750 nm (provided by Beijing Institute of Biophysics, Academia Sinica, China) before the photomultiplier tube (PMT) window and detecting the intensities of ECL passing through these filters respectively under same experimental conditions.

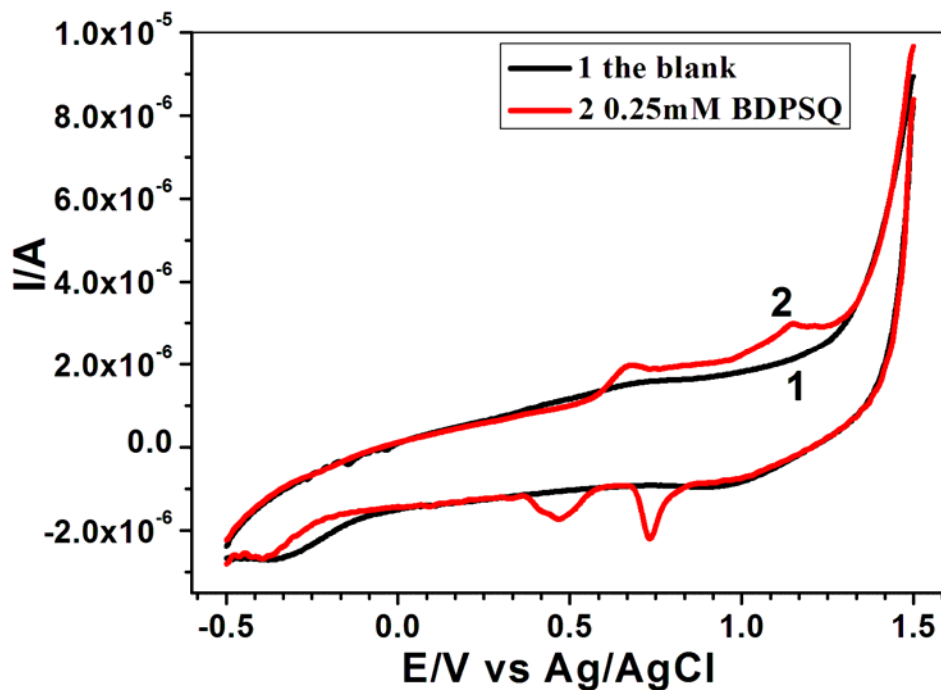

**Fig. S1** Cyclic voltammogram of 0.25mM BDPSQ, in  $\text{CH}_2\text{Cl}_2$  with 0.1M TBAP as the supporting electrolyte at Pt electrode(3.0mm), Scan rate at 60mV/s, the curve 1 is the CV of the blank.

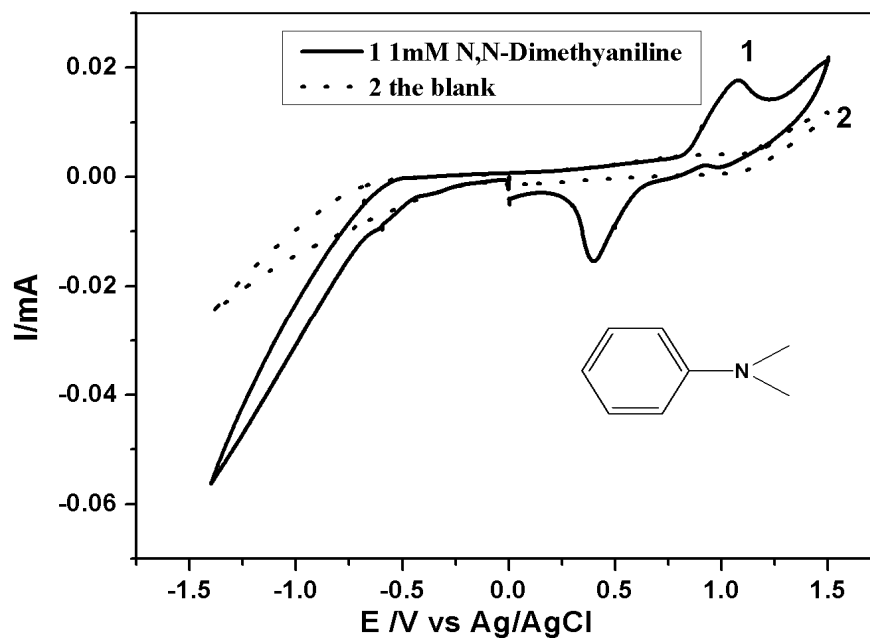

**Fig. S2** Cyclic voltammogram of 1mM N, N-dimethylaniline, in  $\text{CHCl}_3$  with 0.1M TBAP as the supporting electrolyte at Pt electrode, Scan rate at 50mV/s. the curve 2 is the CV of the blank.

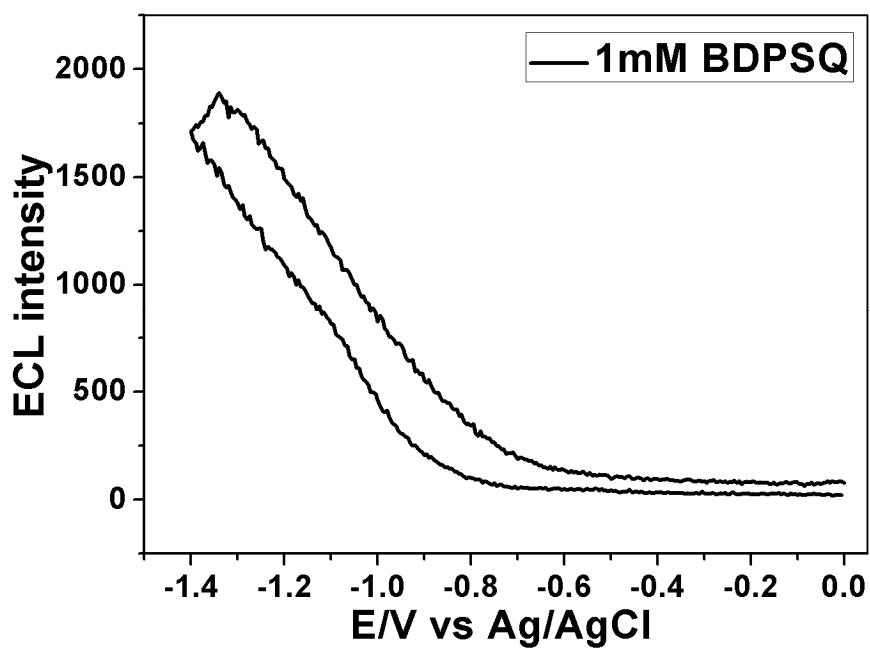

**Fig. S3** ECL potential curve of BDPSQ from 0 to -1.4V at Pt electrode ( $\phi=3.0\text{mm}$ ) in  $\text{CHCl}_3$

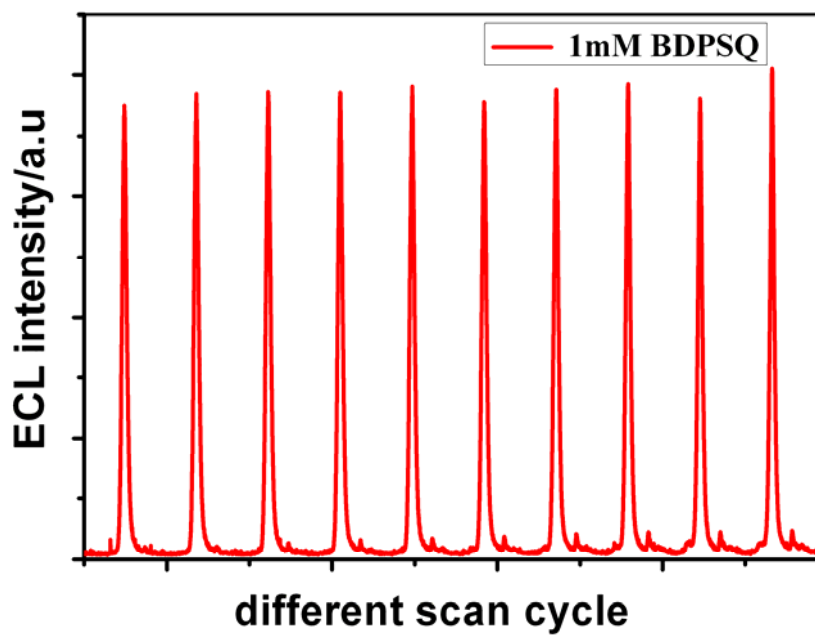

**Fig. S4** The stability of ECL intensity scan at negative potential (-1.4-0V) with different cycles at the same electrode Pt ( $\phi=3\text{mm}$ )

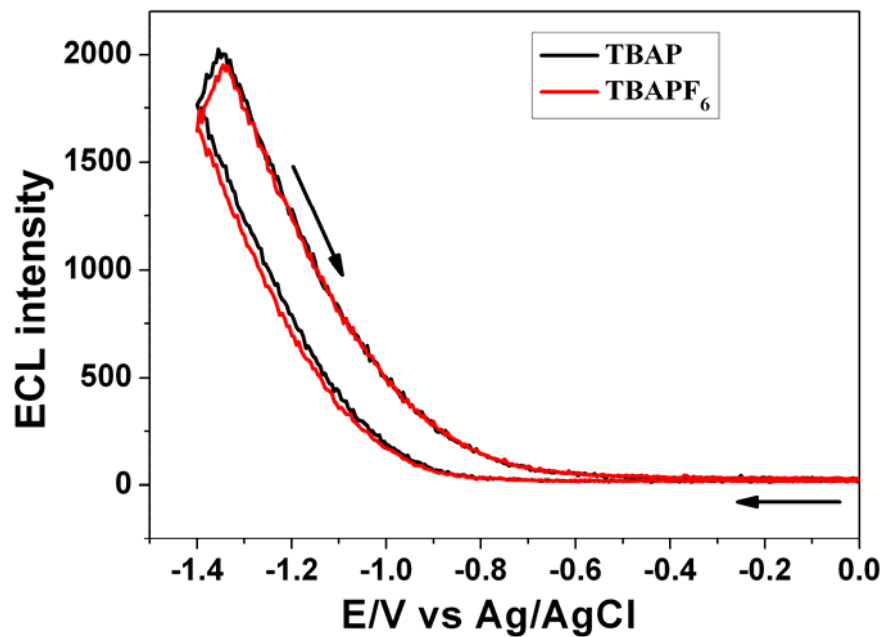

**Fig. S5** The influence of different supporting electrolytes (TBAP and TAPF<sub>6</sub>) to the ECL of 1mM BDPSQ.

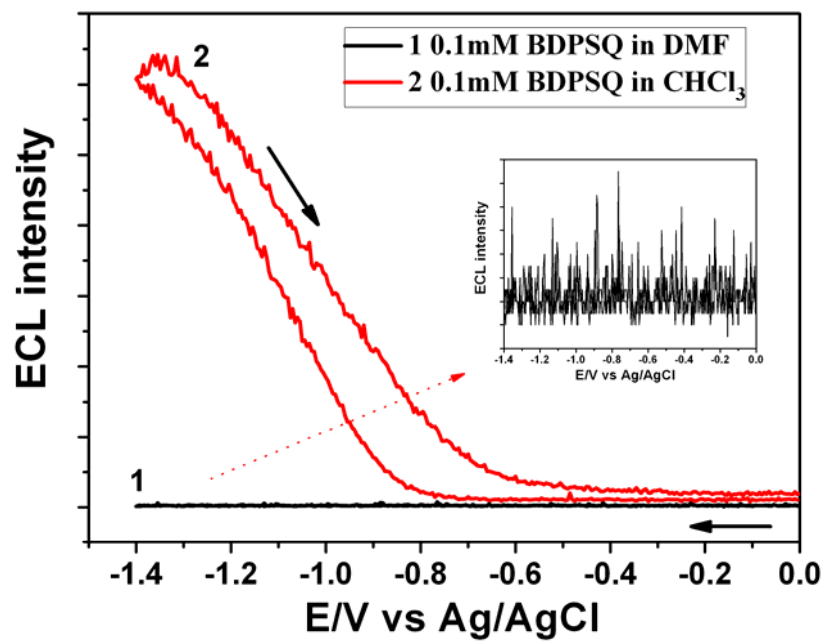

**Fig. S6** The influence of different solvents (DMF and CHCl<sub>3</sub>) on the ECL of 1mM BDPSQ Inset: amplified ECL of the BDPSQ in DMF solvent

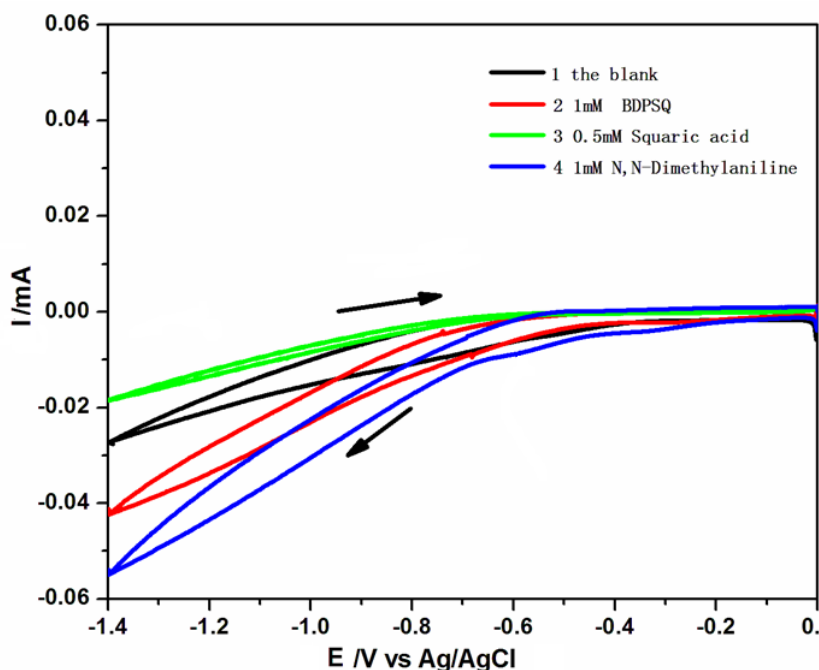

**Fig. S7** Cyclic voltammograms of the blank(1) ,the BDPSQ(2) and the different precursors (the squaric acid (3) and N, N-dimethylaniline(4)) on the same condition (0.1M TBAP in  $\text{CHCl}_3$  solution with scan rate 50mV/s at a Pt working electrode(3.0mm))

### Discussion on the dynamics process of ECL

The detailed ECL dynamics is not easy to be clarified as there's no obvious reduction peak observed due to the significant reduction current from the solvent. Therefore, it is difficult to determine if BDPSQ is reduced by the direct electrochemical reduction (heterogeneous) or the catalytic reduction by the solvent (homogeneous). Therefore, both routes are possible here. It is also difficult to calculate the quantum yield of ECL and the reaction rate constant for the reduction of BDPSQ.

$\text{BDPSQ}^-$  seems to be an unstable intermediate compared with  $\text{BDPSQ}^+$ , because of the observation of higher ECL in a wider potential region (-1.4~1.4V), as  $\text{BDPSQ}^+$  is stable enough to be annihilated with  $\text{BDPSQ}^-$  in spite of the fact that most of the  $\text{BDPSQ}^+$  can be electrochemically reduced as can be seen in Figure S1, while, in the positive region, no ECL is observed, suggesting that  $\text{BDPSQ}^-$  is not stable enough for annihilation in the positive region.

For the catalytic reduction of BDPSQ, which involves the homogeneous reaction of BDPSQ and  $\text{CHCl}_3^-$ , although the reaction  $\text{CHCl}_3^-$  with BDPSQ is only occurring at an appreciable rate, the substantial amount of  $\text{CHCl}_3$  (solvent) that can be significantly reduced at the electrode is likely to trigger the reaction to produce more  $\text{BDPSQ}^-$  for ECL.

The formal potential of  $\text{BDPSQ}^{0/-}$  and  $\text{CHCl}_3^{0/-}$  is also difficult to determine, because there are no well-defined redox peaks from the CVs. Even though, there is an ECL peak observed at ca. -1.3V, it doesn't necessarily mean that it is corresponding to the electrochemical reduction of BDPSQ, because the ECL process involves the homogeneous reaction, which is determined by

both the concentration of BDPSQ<sup>-</sup> by CHCl<sub>2</sub>•, and some other pre- or post- reactions at the electrode.

**Reference** : S1. (a) A. H. Schmidt. *Synthesis*, 1980. 961; (b)G. Maahs and P. Hegenberg. *Angew. Chem. Int. Ed. Engl.*, 1966 (**5**), 888; (c) K.Y .Law and F. C Bailey. *Can. J. Chem.* 1986 (**64**), 2267.
